# Supplementary material for: A new habitat map of the Lena Delta in Arctic Siberia based on field and remote sensing datasets
Source: Copernicus journal article supplement (doi:10.5194/essd-2023-36), 2023-02-24
Supplement: Supplementary file 1 [file essd-2023-36-supplement.pdf]

# Supplementary Material

## **A new habitat map of the Lena Delta in Arctic Siberia based on field and remote sensing datasets**

Simeon Lisovski<sup>1,\*</sup>, Alexandra Runge<sup>2,\*</sup>, Iuliia Shevtsova<sup>1</sup>, Nele Landgraf<sup>3</sup>, Anne Morgenstern<sup>2</sup>, Ronald Reagan Okoth<sup>1,4</sup>, Matthias Fuchs<sup>2</sup>, Nikolay Lashchinskiy<sup>5,6</sup>, Carl Stadie<sup>2,7</sup>, Alison Beamish<sup>8</sup>, Ulrike Herzschuh<sup>1,9,10</sup>, Guido Grosse<sup>1,11</sup>, Birgit Heim<sup>1</sup>

\* Both authors contributed equally

<sup>1</sup> Alfred Wegener Institute Helmholtz Centre for Polar and Marine Research, Polar Terrestrial Environmental Systems, 14473 Potsdam, Germany

<sup>2</sup> Alfred Wegener Institute Helmholtz Centre for Polar and Marine Research, Permafrost Research, 14473 Potsdam, Germany

<sup>3</sup> Humboldt University, Department of Geosciences, 12489 Berlin, Germany

<sup>4</sup> Julius-Maximilians Universität Würzburg, Institute of Geography and Geology, Oswald-Külpe-Weg 86, 97074 Würzburg, Germany

<sup>5</sup> Central Siberian Botanical Garden, Siberian Branch, Russian Academy of Sciences, Novosibirsk, 630090 Russia

<sup>6</sup> Trofimuk Institute of Petroleum Geology and Geophysics, Siberian Branch, Russian Academy of Sciences, Novosibirsk, 630090 Russia

<sup>7</sup> University of Greifswald, Institute for Geography and Geology, Germany (current address: University of Copenhagen, Department of Earth Science and Nature Management, Denmark)

<sup>8</sup> GFZ German Research Centre for Geosciences, Helmholtz Centre Potsdam.

<sup>9</sup> University of Potsdam, Institute of Environmental Sciences & Geography, Karl-Liebknecht-Str. 24-25, 14476 Potsdam, Germany

<sup>11</sup> University of Potsdam, Institute of Biochemistry and Biology, Karl-Liebknecht-Str. 24-25, 14476 Potsdam, Germany

<sup>12</sup> University of Potsdam, Institute of Geosciences, Karl-Liebknecht-Str. 24-25, 14476 Potsdam, Germany

*Correspondence to:* Simeon Lisovski (Simeon.Lisovski@awi.de)

**Table S1:** Vegetation plots in the central Lena Delta, mainly on Kurungnakh and Samoylov islands (Dateset 1, 2: Shevtsova et al. 2021a, Shevtsova et al. 2021b).

| <b>Vegetation Plot Code</b> | <b>N Latitude</b> | <b>E Longitude</b> | <b>Date</b> | <b>Landscape</b>                                                      | <b>Habitat</b>                            |
|-----------------------------|-------------------|--------------------|-------------|-----------------------------------------------------------------------|-------------------------------------------|
| LD18-VP01                   | N 72.2920         | E 126.1606         | 01.08.2018  | Yedoma upland, wet sedge and moss-dominated tundra                    | <b>Polygonal tundra complex</b>           |
| LD18-VP02                   | N 72.2911         | E 126.1651         | 01.08.2018  | Yedoma upland, wet sedge and moss-dominated tundra                    | <b>Polygonal tundra complex</b>           |
| LD18-VP03                   | N 72.2839         | E 126.1955         | 02.08.2018  | tundra slope                                                          | <b>Dry tundra communities</b>             |
| LD18-VP04                   | N 72.28179        | E 126.1942         | 02.08.2018  | terrace with shrub communities (> 30 cm height)                       | <b>Dry shrub communities</b>              |
| LD18-VP05                   | N 72.3229         | E 126.2553         | 03.08.2018  | young drained lake basin, baydzherakhs and wet basin floor            | <b>Dry grass to wet sedge communities</b> |
| LD18-VP06                   | N 72.3228         | E 126.2583         | 03.08.2018  | young drained lake basin, rim with shrub communities (> 50 cm height) | <b>Dry grass to wet sedge communities</b> |
| LD18-VP07                   | N 72.3243         | E 126.2633         | 04.08.2018  | Yedoma upland, wet sedge and moss-dominated tundra                    | <b>Polygonal tundra complex</b>           |
| LD18-VP08                   | N 72.3265         | E 126.2638         | 04.08.2018  | Yedoma upland, wet sedge and moss-dominated tundra                    | <b>Polygonal tundra complex</b>           |
| LD18-VP09                   | N 72.3057         | E 126.2506         | 07.08.2018  | alas floor, tussock                                                   | <b>Dry tundra communities</b>             |
| LD18-VP10                   | N 72.3042         | E 126.2511         | 07.08.2018  | alas floor, tussock                                                   | <b>Dry tundra communities</b>             |
| LD18-VP11                   | N 72.3330         | E 126.281536       | 08.08.2018  | thermo-erosional valley                                               | <b>Dry grass to wet sedge communities</b> |
| LD18-VP13                   | N 72.3679         | E 126.2573         | 10.08.2018  | tussock on slope                                                      | <b>Dry tundra communities</b>             |
| LD18-VP14                   | N 72.3657         | E 126.2731         | 10.08.2018  | Yedoma upland, wet sedge and moss-dominated tundra                    | <b>Polygonal tundra complex</b>           |
| LD18-VP15                   | N 72.3794         | E 126.3892         | 11.08.2018  | polygonal tundra, Holocene terrace                                    | <b>Polygonal tundra complex</b>           |

|            |           |            |            |                                                                                                       |                                                            |
|------------|-----------|------------|------------|-------------------------------------------------------------------------------------------------------|------------------------------------------------------------|
| LD18-VP16  | N 72.3728 | E 126.4702 | 14.08.2018 | floodplain, dry ridge with shrub communities                                                          | <b>Dry shrub communities</b>                               |
| LD18-VP17  | N 72.3873 | E 126.4791 | 15.08.2018 | floodplain, <i>Salix</i> , Alder                                                                      | <b>Moist <i>Equisetum</i> and shrubs</b>                   |
| LD18-VP18  | N 72.3669 | E 126.2550 | 16.08.2018 | heterogenous plot (not used for training)                                                             |                                                            |
| LD18-VP19- | N 72.3623 | E 126.2666 | 16.08.2018 | heterogenous plot (not used for training)                                                             | <b>Dry grass to wet sedge communities</b>                  |
| LD18-VP20  | N 72.3244 | E 126.2731 | 18.08.2016 | thermo-erosional valley slope                                                                         | <b>Dry grass to wet sedge communities</b>                  |
| LD18-VP21  | N 72.3750 | E 126.4987 | 19.08.2018 | polygonal tundra, Holocene terrace                                                                    | <b>Polygonal tundra complex</b>                            |
| LD18-VP22  | N 72.3269 | E 126.0479 | 22.08.2018 | degraded Yedoma on slope                                                                              | <b>Polygonal tundra complex</b><br>(transition to tussock) |
| LD18-VP23  | N 72.3260 | E 126.0544 | 22.08.2018 | degraded Yedoma on slope                                                                              | <b>Polygonal tundra complex</b><br>(transition to tussock) |
| LD18-VP24  | N 72.3292 | E 126.0439 | 22.08.2018 | steep valley slope with high shrub communities<br>(>100 cm) heterogenous plot (not used for training) | <b>Dry shrub communities</b>                               |
| LD18-VP25  | N 72.3283 | E 126.0397 | 22.08.2018 | terrace with shrub communities<br>(>50 cm) heterogenous plot (not used for training)                  | <b>Dry shrub communities</b>                               |
| LD18-VP26  | N 72.3767 | E 126.5038 | 24.08.2018 | polygonal tundra, Holocene terrace                                                                    | <b>Polygonal tundra complex</b>                            |
| LD18-VP27  | N 72.3443 | E 126.1907 | 25.08.2018 | Yedoma upland, wet sedge and moss-dominated tundra                                                    | <b>Polygonal tundra complex</b>                            |

**Table S2:** Cross Reference table for 2018 expedition plots for vegetation and field spectrometry in the central Lena Delta.

| <b>Landscape</b>         | <b>Vegetation Plot [date of survey]</b> | <b>Spectrometry Plot [date of survey]</b> |
|--------------------------|-----------------------------------------|-------------------------------------------|
| Polygonal tundra complex | VP01 [01.08.2018]                       | SP008 [09.08.2018]                        |

|                                                                                                                   |                   |                                          |
|-------------------------------------------------------------------------------------------------------------------|-------------------|------------------------------------------|
| Polygonal tundra complex                                                                                          | VP02 [01.08.2018] | SP009 [09.08.2018]                       |
| Polygonal tundra complex                                                                                          | VP07 [04.08.2018] | SP007 [08.08.2018]                       |
| Polygonal tundra complex                                                                                          | VP08 [04.08.2018] | SP026 [28.08.2018]                       |
| Polygonal tundra complex                                                                                          | VP14 [10.08.2018] | SP013 [10.08.2018]                       |
| dry tundra communities                                                                                            | VP03 [02.08.2018] | SP010 [09.08.2018]<br>SP024 [27.08.2018] |
| dry tussock tundra                                                                                                | VP13 [10.08.2018] | SP015 [10.08.2018]                       |
| dry tussock tundra                                                                                                | VP09              | SP003 [07.08.2018]                       |
| dry tussock tundra                                                                                                | VP10              | SP004 [07.08.2018]                       |
| <b>Dry grass to wet sedge communities</b> in young drained lake basin, baydzherakhs, wet basin floor              | VP05 [03.08.2018] | SP005 [08.08.2018]<br>SP027 [28.08.2018] |
| <b>Dry grass to wet sedge communities</b> in young drained lake basin, rim with shrub communities (>50 cm height) | VP06 [03.08.2018] | SP006 [08.08.2019]                       |
| terrace with dry shrub communities (>30 cm height)                                                                | VP04 [02.08.2018] | SP011 [09.08.2018]<br>SP022 [27.08.2018] |
| <b>Dry grass to wet sedge communities</b> on disturbed slope                                                      | VP19 [16.08.2018] | SP014 [10.08.2018]                       |
| floodplain, dry ridge with dry shrub communities                                                                  | VP16 [14.08.2018] | SP019 [26.08.2018]                       |
| floodplain, <b>Moist <i>Equisetum</i> and shrubs</b>                                                              | VP17 [15.08.2018] | SP018 [26.08.2018]                       |
| floodplain, low shrub communities                                                                                 | NaN               | SP002 [06.08.2018]                       |
| floodplain, sand                                                                                                  | NaN               | SP001 [06.08.2018]                       |

**Table S3:** *Habitat classes of the central delta and 2nd terrace.*

| Habitat class                                                                                                                       | photo                                                                                |
|-------------------------------------------------------------------------------------------------------------------------------------|--------------------------------------------------------------------------------------|
| <p><b>moist Equisetum and shrubs</b><br/>on floodplain, Samoylov Island<br/>(photo AWI 2018)</p>                                    |   |
| <p><b>dry shrub communities</b><br/>on lower terrace on Kurungnakh<br/>Island, flooded during spring flood<br/>(photo AWI 2018)</p> |  |

**moist to wet sedge communities**  
in thermo-erosional valley on  
Kurungnakh Island  
(photo AWI 2018)

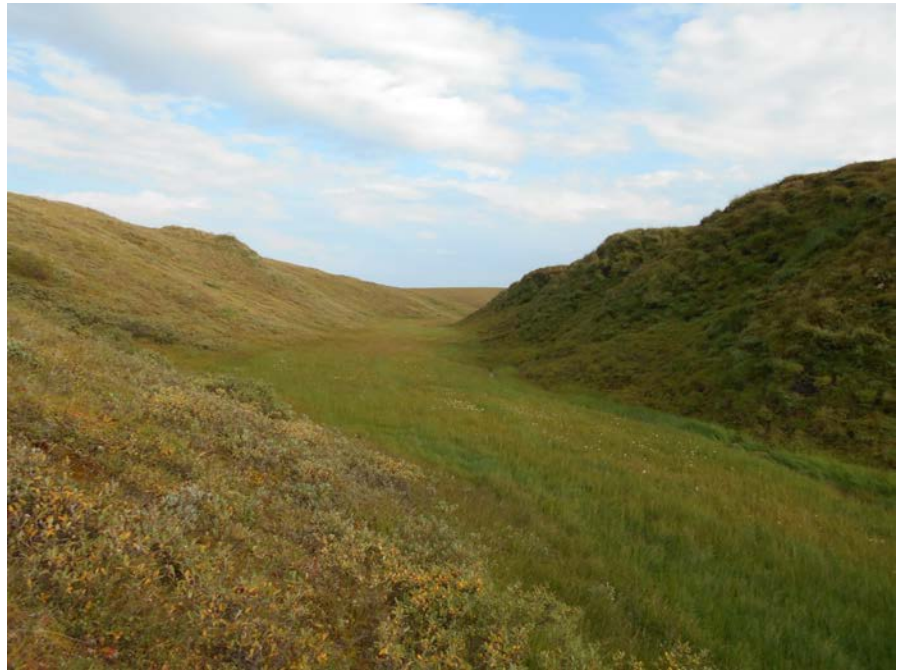

**wet sedge communities**  
on floodplain, Samoylov Island  
(photo AWI 2019)

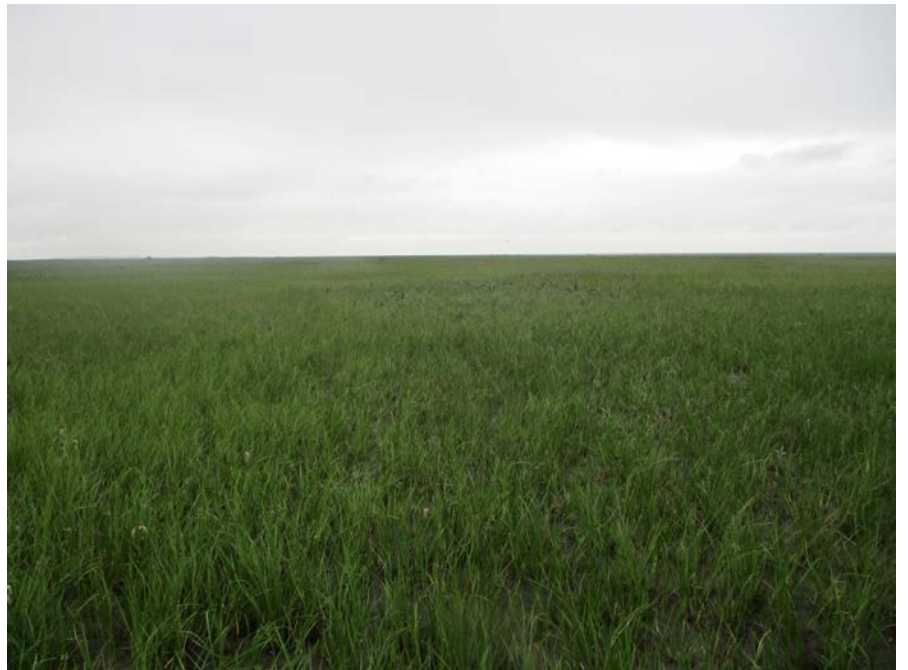



**polygonal tundra up to 10% surface water**  
on Pleistocene Yedoma terrace,  
Kurungnakh Island  
(photo AWI 2018)

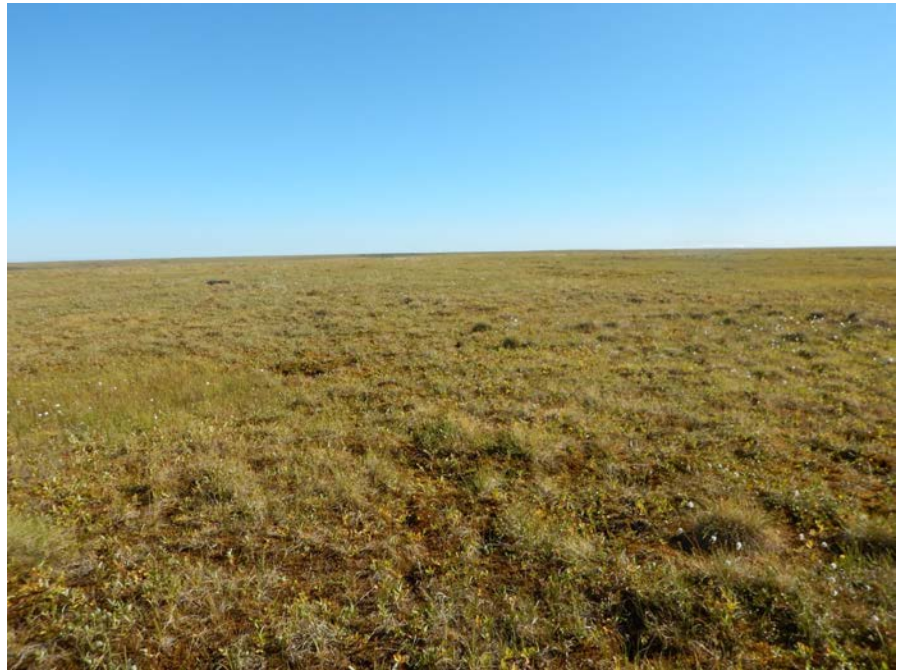

**polygonal tundra up to 20% surface water**  
on Holocene fluvial terrace,  
Island in the central delta  
(photo AWI 2019)

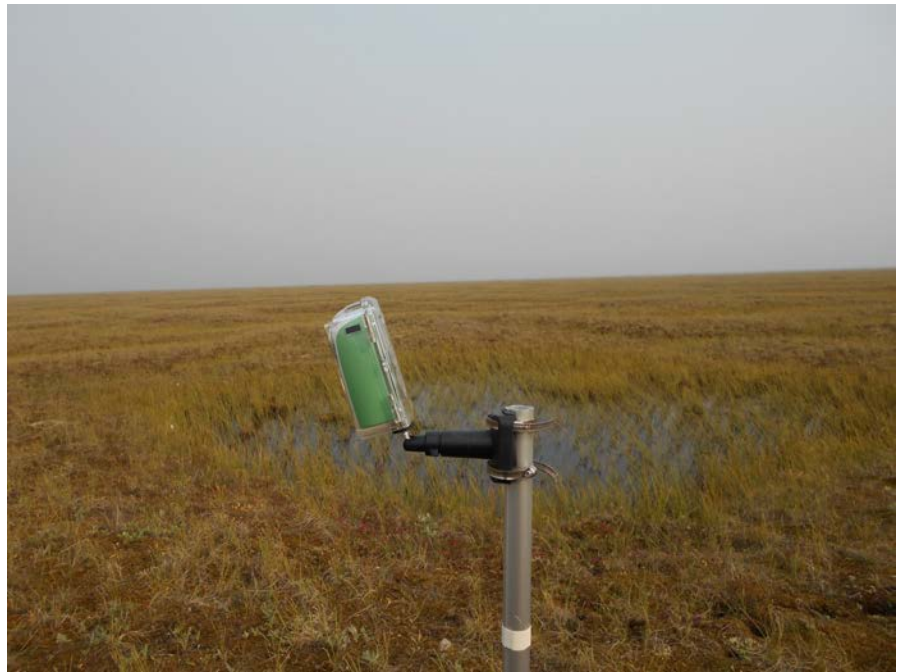

**polygonal tundra up to 50% surface water**  
on Holocene fluvial terrace, Samoylov Island  
(photo AWI 2019)

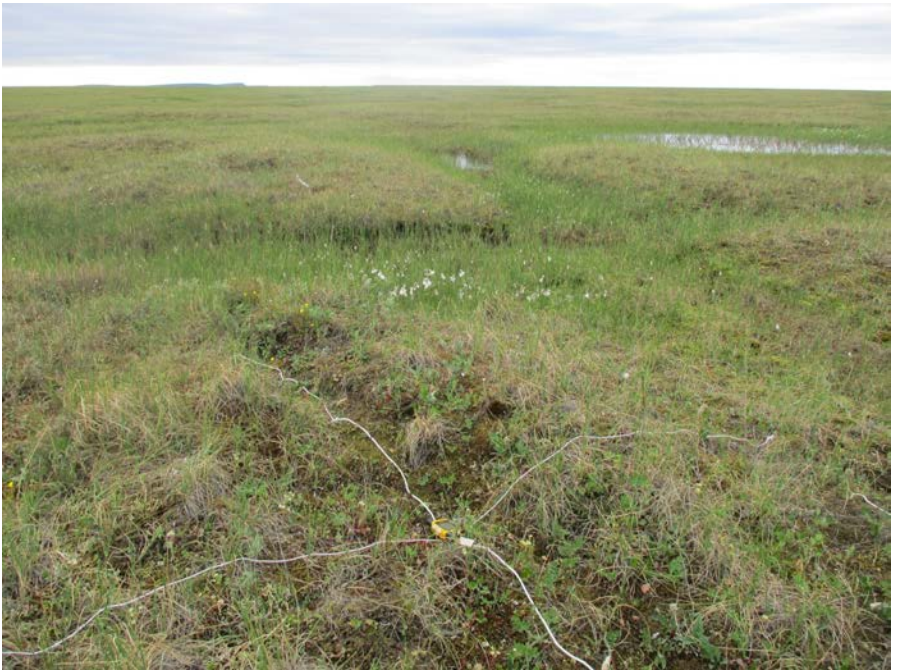

**dry grass to wet sedge communities**  
in young drained lake basin on Kurungnakh Island  
(photo AWI 2018)

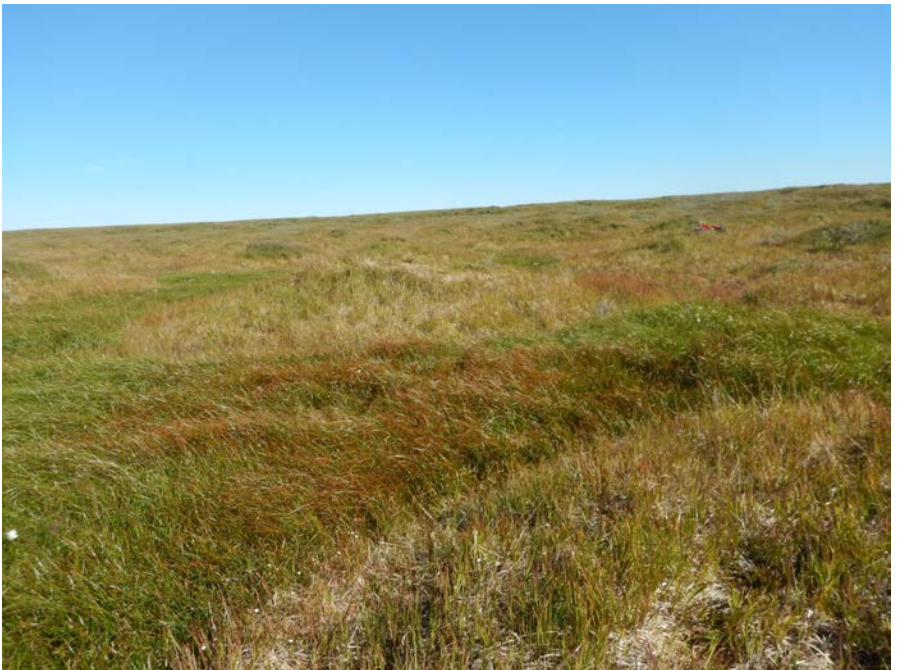



**sparsely vegetated areas**  
on floodplain, Samoylov Island  
(photo AWI 2019)

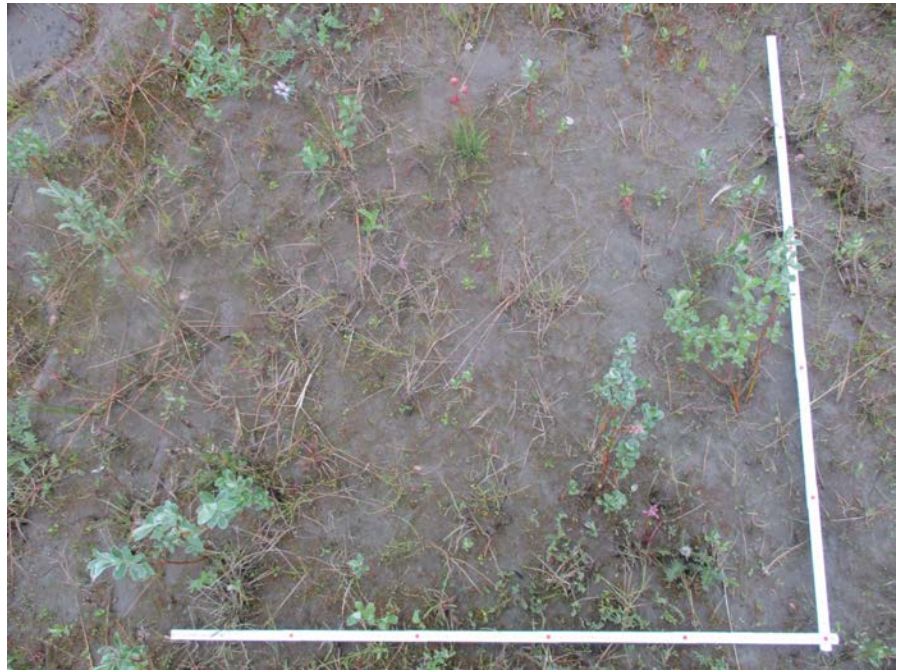

**dry tundra tussock type**  
on drained slopes of Kurungnakh  
Island  
(photo AWI 2018)

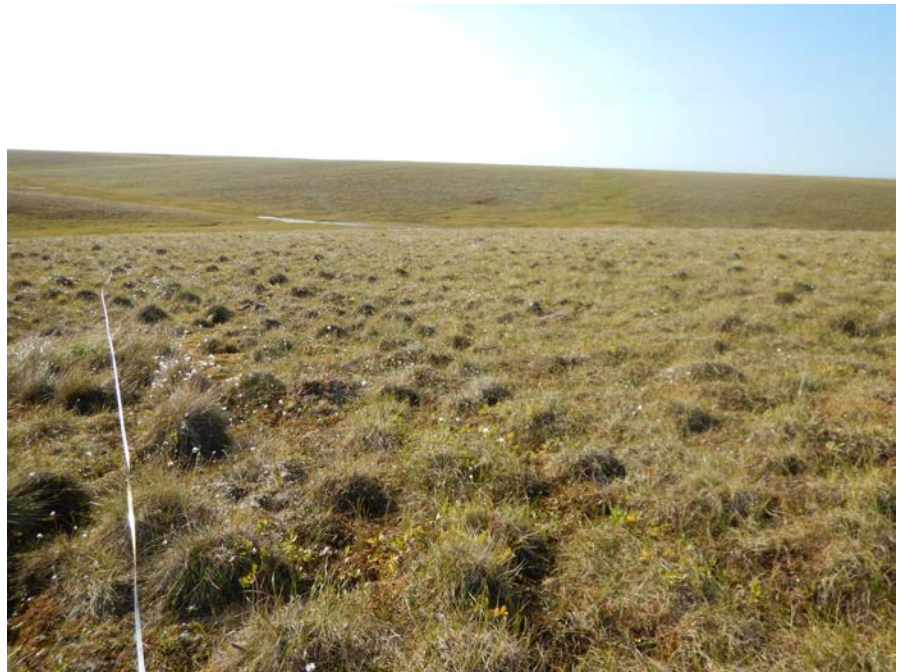

|                                                                                                                                                                                                                                                                              |                                                                                     |
|------------------------------------------------------------------------------------------------------------------------------------------------------------------------------------------------------------------------------------------------------------------------------|-------------------------------------------------------------------------------------|
| <p><b>barren / sand</b><br/>on floodplain, Samoylov Island<br/>(photo AWI 2018)</p>                                                                                                                                                                                          |   |
| <p><b>dwarf shrub - herb communities</b><br/>on the 2nd delta terrace plateau (sandy<br/>Pleistocene fluvial and aeolic complex)<br/><br/>in Schneider et al. 2009, Figure 2d, dry<br/>moss-, sedge-, and dwarf shrub-<br/>dominated tundra (class DMSD);<br/>photo AWI)</p> |  |

**Table S4:** LD18 spectrometry plots and their mean surface reflectance (Dataset 3, Runge et al. 2022). The mean surface reflectance is depicted in dark blue, the standard deviation in light blue, and n states the number of randomly scattered measurements within a spectrometry plot (30 m<sup>2</sup>).

| LD18<br>spectrometry                                  | Surface reflectance plot                                                                          | Field photo                                                                          |
|-------------------------------------------------------|---------------------------------------------------------------------------------------------------|--------------------------------------------------------------------------------------|
| SP-001<br><br>floodplain, sand                        | <p>n = 194</p> 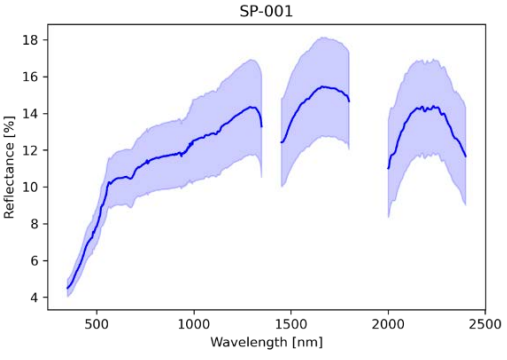  |    |
| SP-002<br><br>floodplain, low shrubs                  | <p>n = 206</p>  |  |
| SP-003<br><br>Drained Lake<br>Basin floor,<br>tussock | <p>n = 89</p>  |                                                                                      |



|                                                                                                                                                    |                                                                                                                                                                                                      |                                                                                                                                                                          |
|----------------------------------------------------------------------------------------------------------------------------------------------------|------------------------------------------------------------------------------------------------------------------------------------------------------------------------------------------------------|--------------------------------------------------------------------------------------------------------------------------------------------------------------------------|
| <p>SP-004</p> <p>Drained Lake<br/>Basin floor,<br/>tussock</p>                                                                                     | <p>n =56</p> 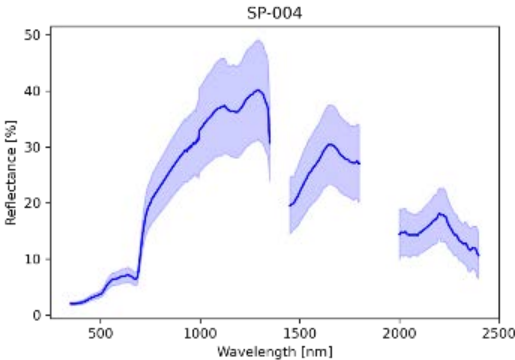                                                                                                       |                                                                                                                                                                          |
| <p>SP-005 / SP-027</p> <p>young drained lake,<br/>Baydzherakhs<br/>and wet basin<br/>floor</p> <p>SP-005: 2018-08-08</p> <p>SP-027: 2018-08-28</p> | <p>n = 106</p>  <p>n = 126</p>  |   |



|                                                                                         |                                                                                                    |                                                                                      |
|-----------------------------------------------------------------------------------------|----------------------------------------------------------------------------------------------------|--------------------------------------------------------------------------------------|
| <p>SP-006</p> <p>young drained lake, rim with shrub communities (&gt; 50 cm height)</p> | <p>n = 106</p> 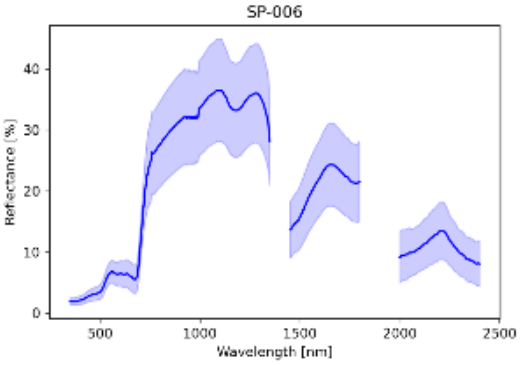   |    |
| <p>SP-007</p> <p>Yedoma upland, wet sedge and moss-dominated tundra</p>                 | <p>n = 106</p>   |   |
| <p>SP-008</p> <p>Yedoma upland, wet sedge and moss-dominated tundra</p>                 | <p>n = 107</p>  |  |

|                                                                                                             |                                                                                                                                                                                                      |                                                                                                                                                                          |
|-------------------------------------------------------------------------------------------------------------|------------------------------------------------------------------------------------------------------------------------------------------------------------------------------------------------------|--------------------------------------------------------------------------------------------------------------------------------------------------------------------------|
| <p>SP-009</p> <p>Yedoma upland, wet sedge and moss-dominated tundra</p>                                     | <p>n = 109</p> 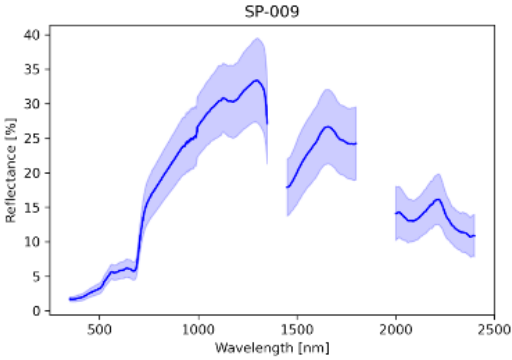                                                                                                     |                                                                                        |
| <p>SP-010 / SP-024</p> <p>tundra slope south-facing</p> <p>SP-010: 2018-08-09</p> <p>SP-024: 2018-08-27</p> | <p>n = 111</p>  <p>n = 108</p>  |   |

SP-011 / SP-022

terrace with shrub communities (> 30 cm height)

SP-011: 2018-08-09

SP-022: 2018-08-27

n = 108

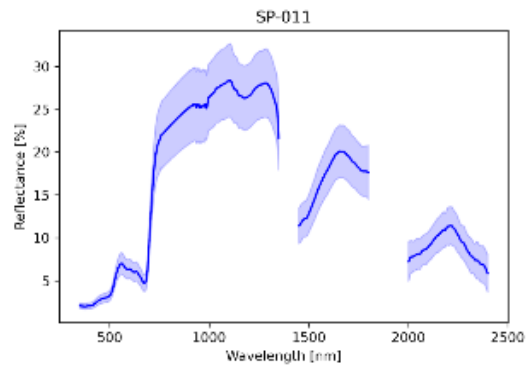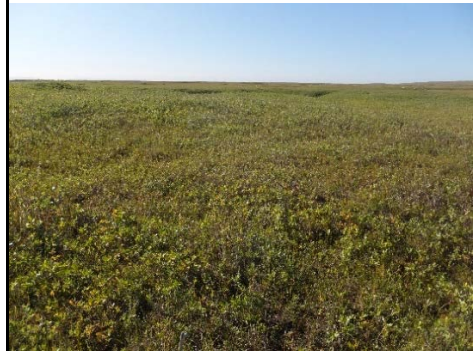

n = 110

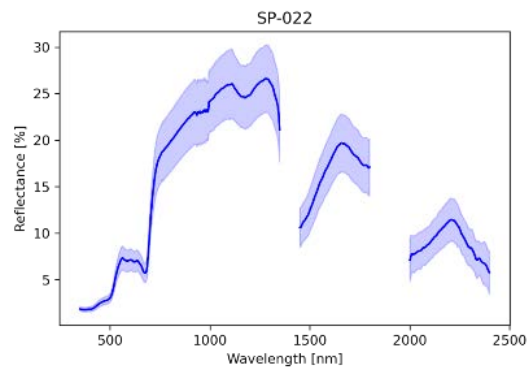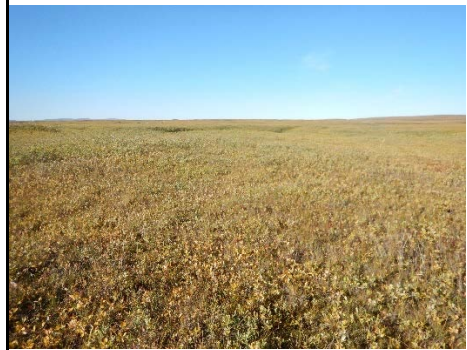

SP-012

terrace, wet (~ 20 cm)

n = 73

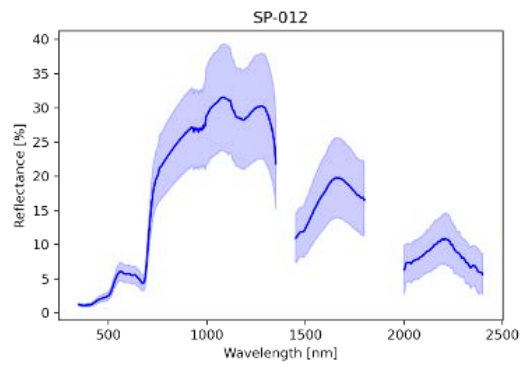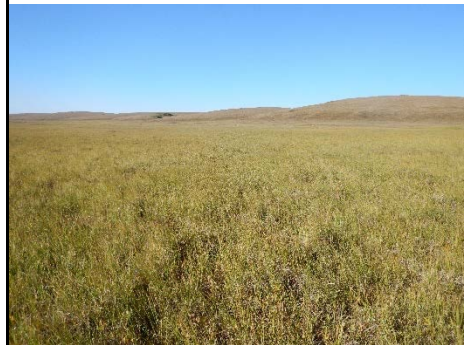

SP-013

Yedoma upland, wet  
sedge and  
moss-  
dominated  
tundra

n = 106

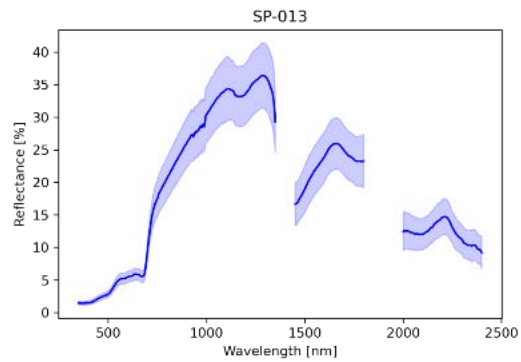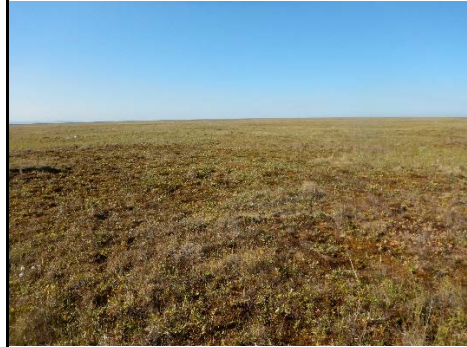

SP-014

disturbed slope,  
grasses and  
shrubs

n = 120

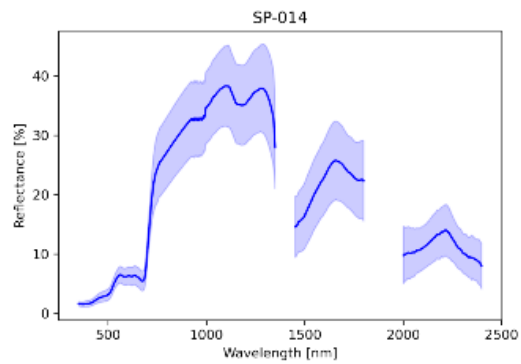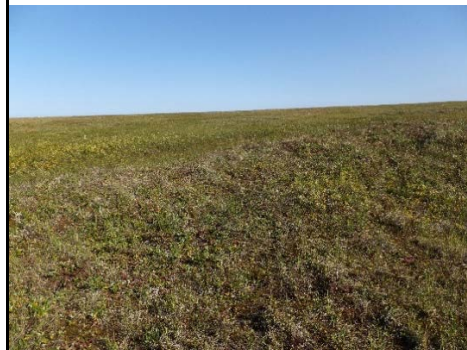

SP-015

tussock on  
slope,  
southwest-  
facing

n = 106

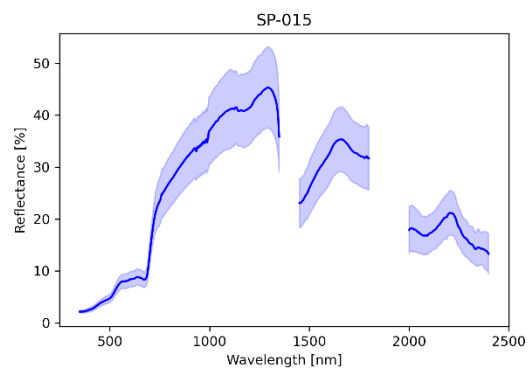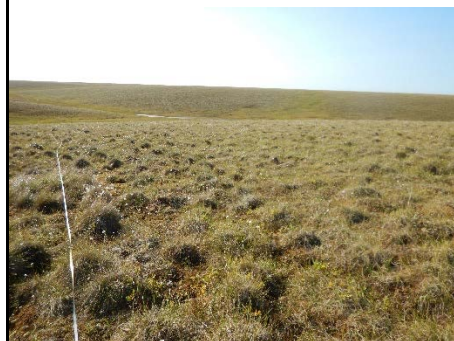



|                                                      |                                                                                                    |                                                                                      |
|------------------------------------------------------|----------------------------------------------------------------------------------------------------|--------------------------------------------------------------------------------------|
| <p>SP-016</p> <p>floodplain, Salix and mosses</p>    | <p>n = 116</p> 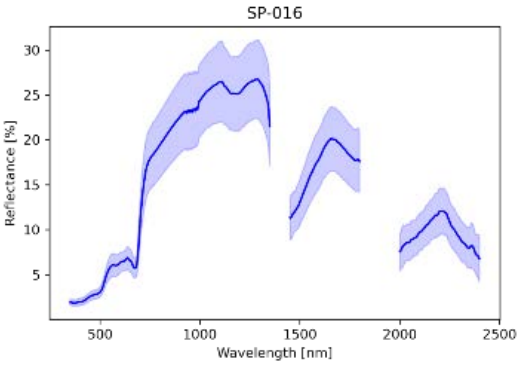   |    |
| <p>SP-017</p> <p>floodplain, sand</p>                | <p>n = 50</p>    |   |
| <p>SP-018</p> <p>floodplain, moist, Salix, Alder</p> | <p>n = 106</p>  |  |

|                                                                   |                                                                                                                  |                                                                                      |
|-------------------------------------------------------------------|------------------------------------------------------------------------------------------------------------------|--------------------------------------------------------------------------------------|
| <p>SP-019</p> <p>floodplain, dry ridge with shrub communities</p> | <p>n = 106</p> <p>SP-019</p> 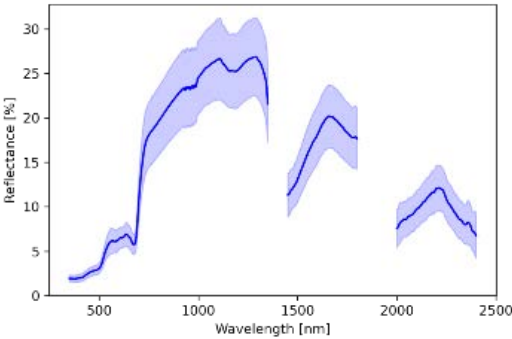   |    |
| <p>SP-020</p> <p>Drained Lake Basin floor, mosses, wet</p>        | <p>n = 106</p> <p>SP-020</p>   |   |
| <p>SP-021</p> <p>Drained Lake Basin floor, polygonal network</p>  | <p>n = 113</p> <p>SP-021</p>  |  |

SP-023

in between  
slopes, wet  
depression

n = 118

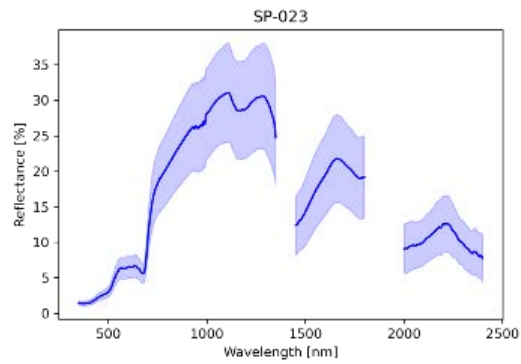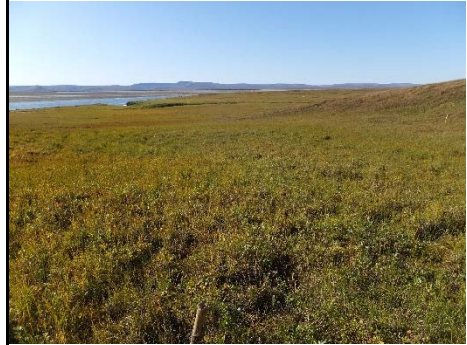

SP-025

terrace, wet

n = 106

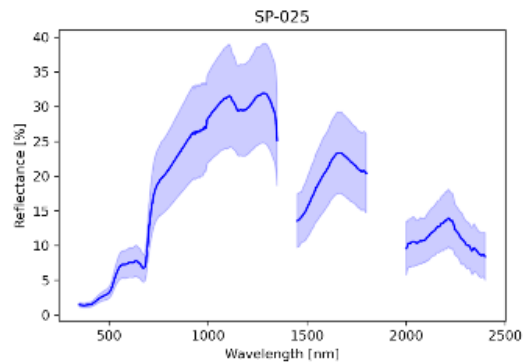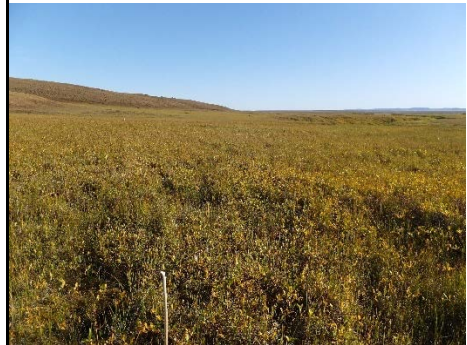

SP-026

Yedoma  
upland, wet  
sedge and  
moss-  
dominated  
tundra

n = 108

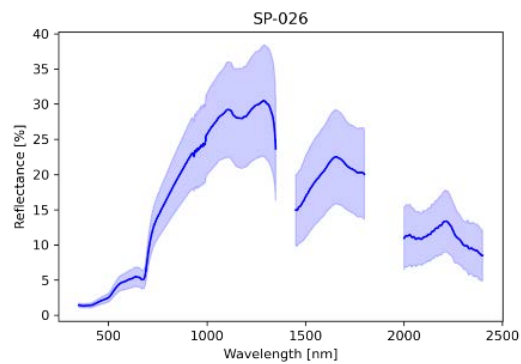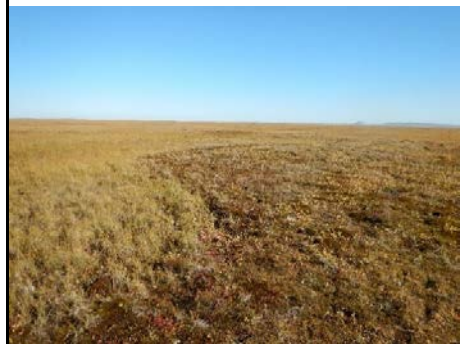

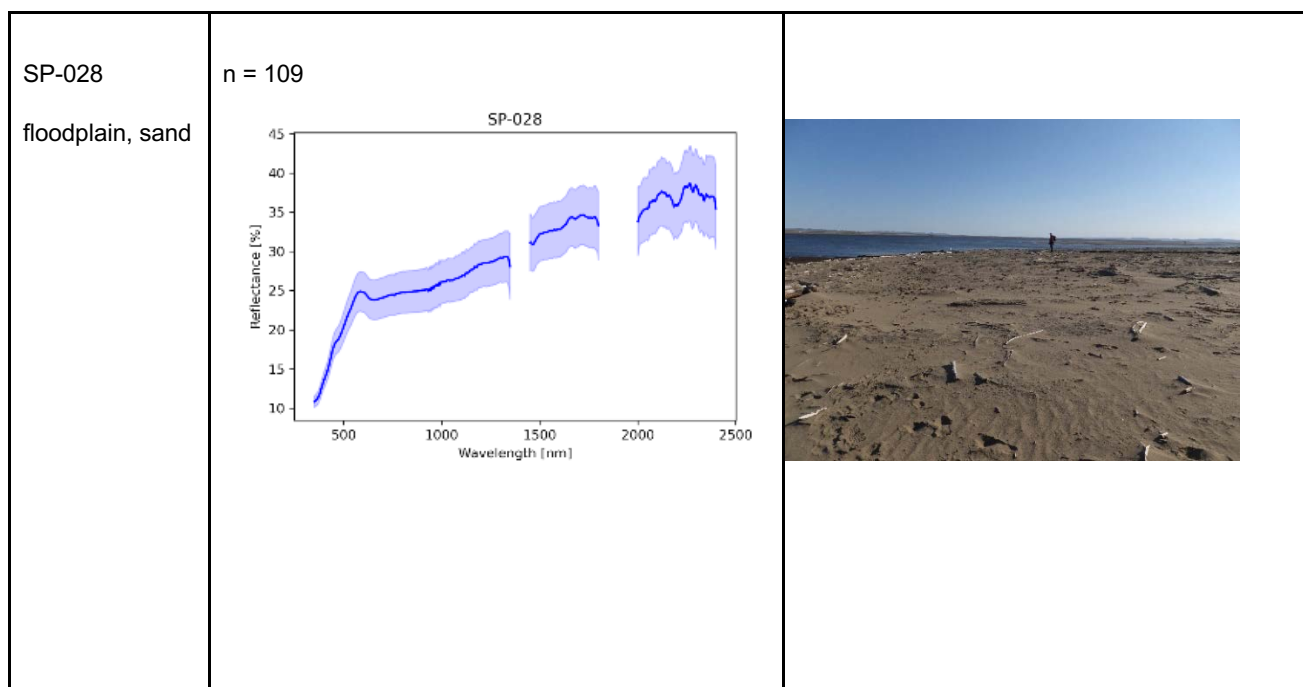

**Table S5:** Accuracy and precision results of the cross validation.

| Class | Name                                            | Accuracy | Precision | Correlation | Error rate | Samples |
|-------|-------------------------------------------------|----------|-----------|-------------|------------|---------|
| 0     | <i>Moist Equisetum and Shrubs on Floodplain</i> | 0.999    | 0.987     | 0.990       | 0.001      | 4313    |
| 1     | <i>Dry Low Shrub Community</i>                  | 0.998    | 0.952     | 0.975       | 0.002      | 4314    |
| 2     | <i>Moist to Wet Sedge Complex</i>               | 0.997    | 0.976     | 0.983       | 0.004      | 4315    |
| 3     | <i>Wet Sedge Complex</i>                        | 0.951    | 0.959     | 0.959       | 0.009      | 4316    |
| 4     | <i>PC_50%: Wet Polygon Complex</i>              | 0.988    | 0.950     | 0.941       | 0.012      | 4317    |
| 5     | <i>PC_20%: Moist Polygon Complex</i>            | 0.986    | 0.938     | 0.934       | 0.014      | 4318    |
| 6     | <i>Dry Grass to Wet Sedge Complex</i>           | 0.981    | 0.949     | 0.949       | 0.010      | 4319    |
| 7     | <i>'Sparsely Vegetated Areas'</i>               | 1.000    | 0.997     | 0.997       | 0.001      | 4320    |
| 8     | <i>Dry Tundra Communities</i>                   | 0.979    | 0.966     | 0.966       | 0.007      | 4321    |



|   |                                        |       |       |       |       |      |
|---|----------------------------------------|-------|-------|-------|-------|------|
| 9 | <i>PC_10%: Dry<br/>Polygon Complex</i> | 0.996 | 0.984 | 0.981 | 0.004 | 4322 |
|---|----------------------------------------|-------|-------|-------|-------|------|

**Table S6:** Cross match of the vegetation/habitat classes from the three different Lena Delta classification products discussed in the main text (Schneider et al. 2009, Bartsch et al. 2019, Lisovski et al. 2022).

| Authors                                   | Schneider et al 2009                                  | Lisovski et al 2022                             | Bartsch et al. 2019                                                                                                                                                                                                                  |
|-------------------------------------------|-------------------------------------------------------|-------------------------------------------------|--------------------------------------------------------------------------------------------------------------------------------------------------------------------------------------------------------------------------------------|
| Product name                              |                                                       | Lena Delta habitat map                          | ESA GlobPermafrost Land Cover (selected regions)                                                                                                                                                                                     |
| sensor                                    | Landsat 7 (30 m)                                      | Sentinel-2 (10 m res.)                          | Sentinel-1, Sentinel-2 (20 m)                                                                                                                                                                                                        |
| time                                      | Summer 2000/2001                                      | Peak summer 2016                                | 2015 -2018                                                                                                                                                                                                                           |
| low disturbance regime land cover classes | Wet sedge and moss dominated tundra WT                | Polygonal tundra complex up to 50 % water PC 50 | Disturbed, including forest fire scars, seasonally inundated areas and landslide scars                                                                                                                                               |
|                                           | Moist grass and moss-dominated tundra MT              | Polygonal tundra complex up to 20 % water PC 20 | Sparse vegetation (without shrubs), mostly sandy soil; flood plains, recent landslides, also within fire scars                                                                                                                       |
|                                           |                                                       | Polygonal tundra complex up to 10 % water PC 10 | Graminoid, prostrate dwarf shrub, patterned ground, partially bare<br>Dry cryptogamic-crust                                                                                                                                          |
|                                           | Dry moss- sedge and dwarf shrub dominated tundra DMSD | Dwarf shrub - herb communities DSHH             | Dry cryptogamic-crust                                                                                                                                                                                                                |
|                                           | Dry tussock tundra DT                                 | Dry (tussock) tundra DT                         | Dry to moist prostrate to erect dwarf shrub tundra 'grassland'<br><br>Moist to wet graminoid prostrate to erect dwarf shrub tundra 'grassland'<br><br>Graminoid, prostrate dwarf shrub, patterned ground, partially bare 'grassland' |

|                                            |                                               |                                                                |                                                                                        |
|--------------------------------------------|-----------------------------------------------|----------------------------------------------------------------|----------------------------------------------------------------------------------------|
| high disturbance regime land cover classes | Moist to dry dwarf shrub dominated tundra MDD | Dry low shrub communities DLSH                                 | Wet to waterlogged graminoid prostrate to low shrub tundra                             |
|                                            |                                               | Moist Equisetum and shrub communities I MESH                   | Floodplain, mostly fluvial                                                             |
|                                            |                                               | Moist to wet sedge complex MWS                                 |                                                                                        |
|                                            |                                               | Wet sedge complex WS                                           | Wet to waterlogged graminoid prostrate to low shrub tundra                             |
|                                            | Dry grass-dominated tundra DG                 | Dry grass- to wet sedge complexes with low shrub communities D | Moist to wet graminoid prostrate to erect dwarf shrub tundra                           |
| very high disturbance classes              | Mainly non-vegetated areas (NV)               | Sparsely vegetated                                             | Disturbed, including forest fire scars, seasonally inundated areas and landslide scars |
|                                            |                                               | Barren, sand                                                   |                                                                                        |

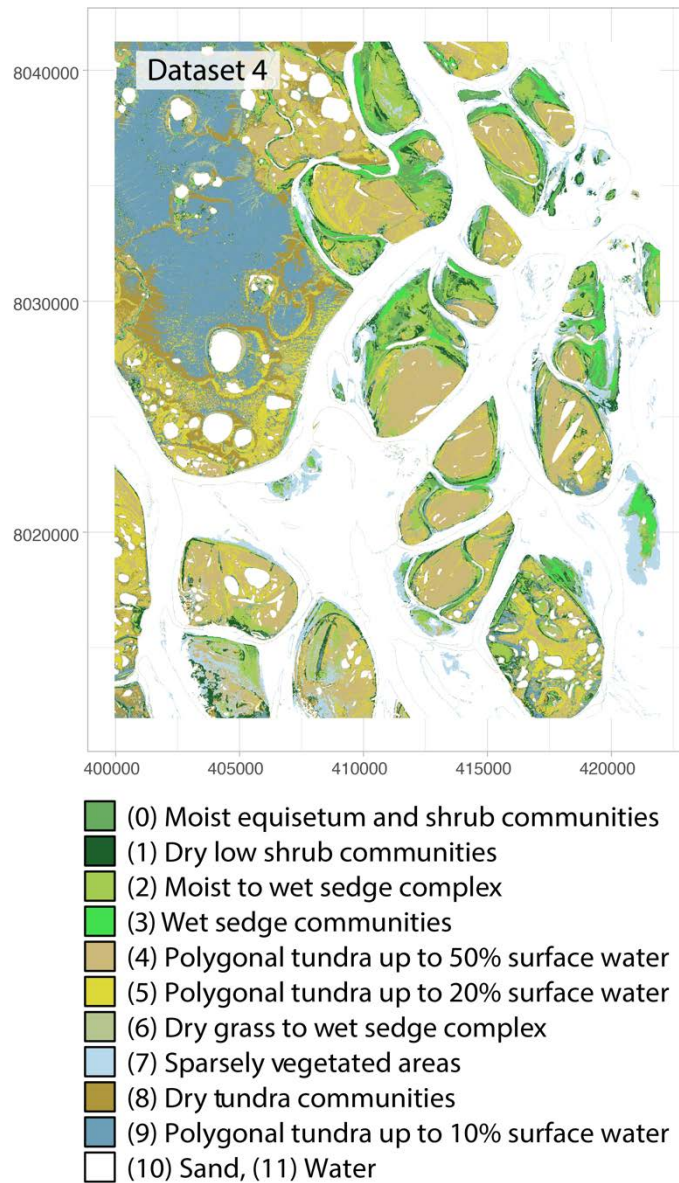

**Figure S1:** Supervised habitat classification of the central Lena Delta based on a cloud-free S-2 August 2018 acquisition (Dataset 4). Numbers in legend correspond to the labels in published Dataset 4 (Landgraf et al. 2022). Universe Transverse Mercator Z52 on WGS 84 projection.

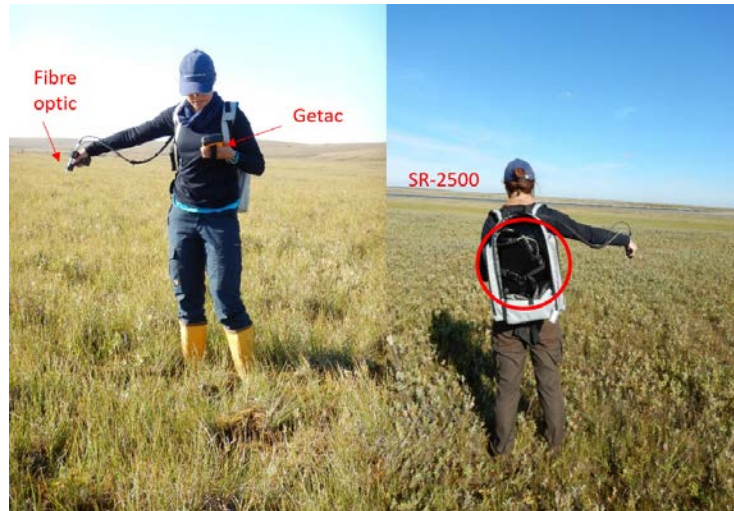

**Figure S2:** Spectral Evolution SR-2500 field-spectrometer measurement set-up in the Lena Delta, August 2018  
(photos: M. Fuchs).



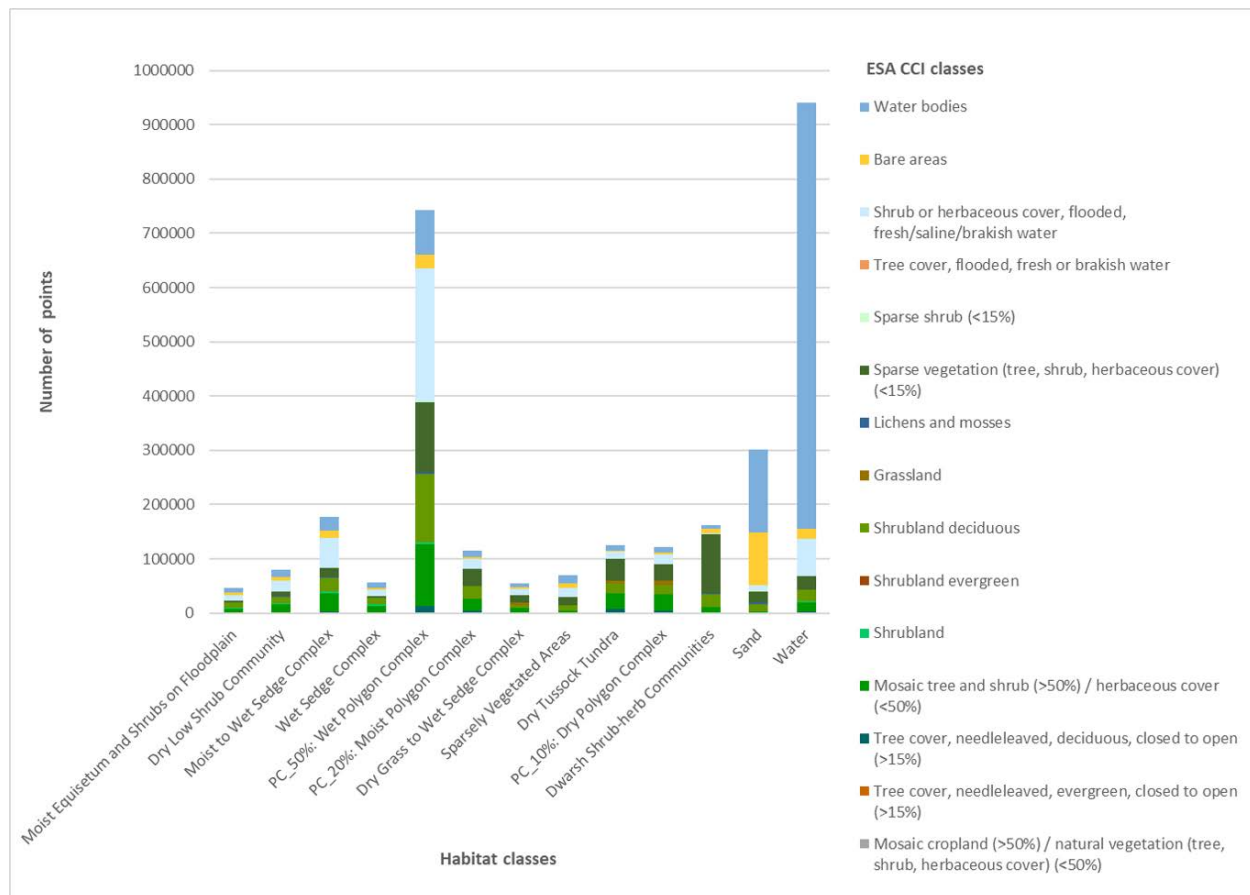

**Figure S3:** Comparison between the habitat classification (Dataset 5) and ESA CCI Landcover classes based on 3 million sampled points, regularly distributed in the Lena Delta.

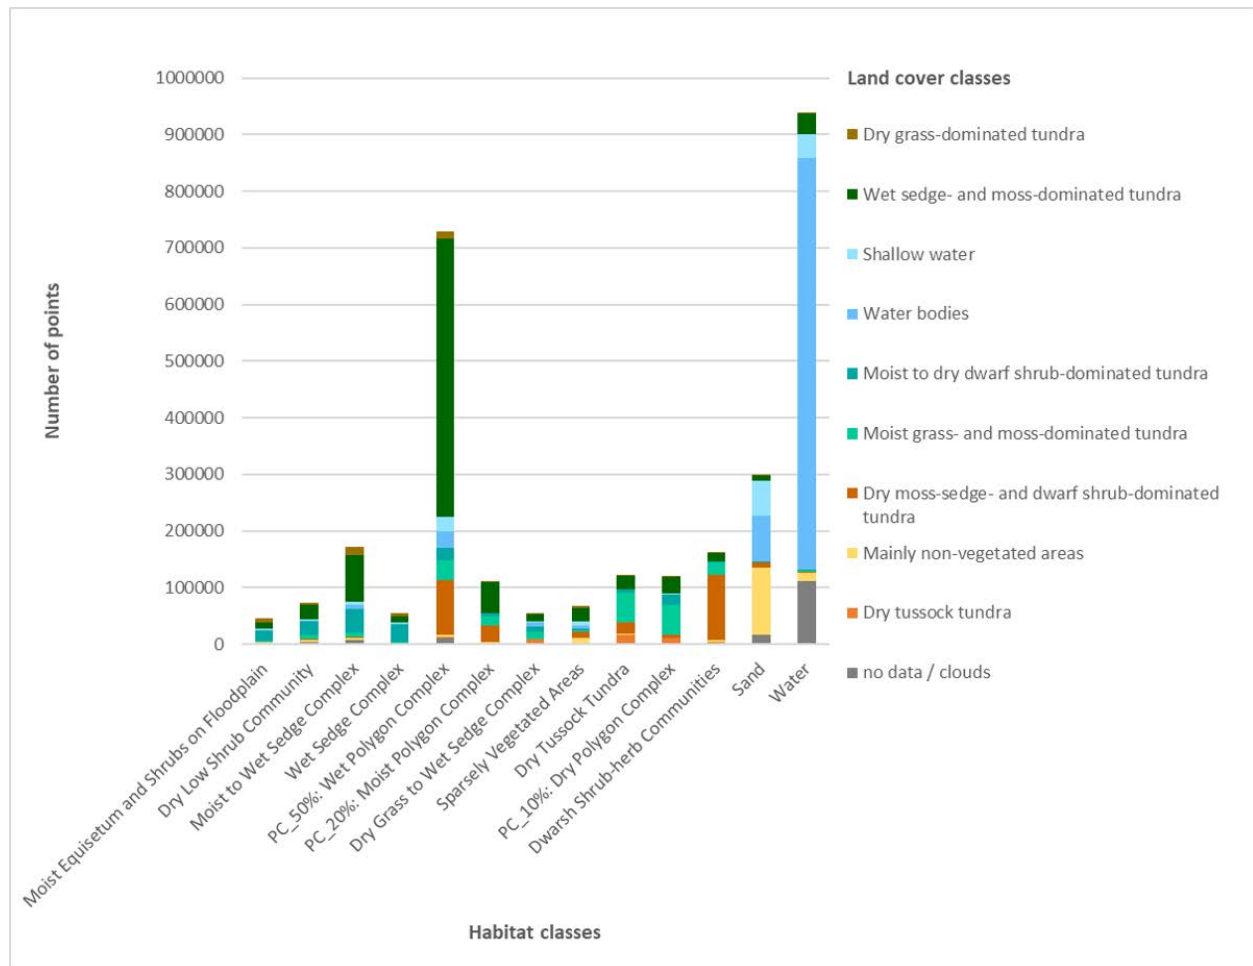

**Figure S4:** Comparison between the habitat classification (Dataset 5) and the land cover classification from Schneider et al. (2009) based on 3 million sampled points, regularly distributed in the Lena Delta.

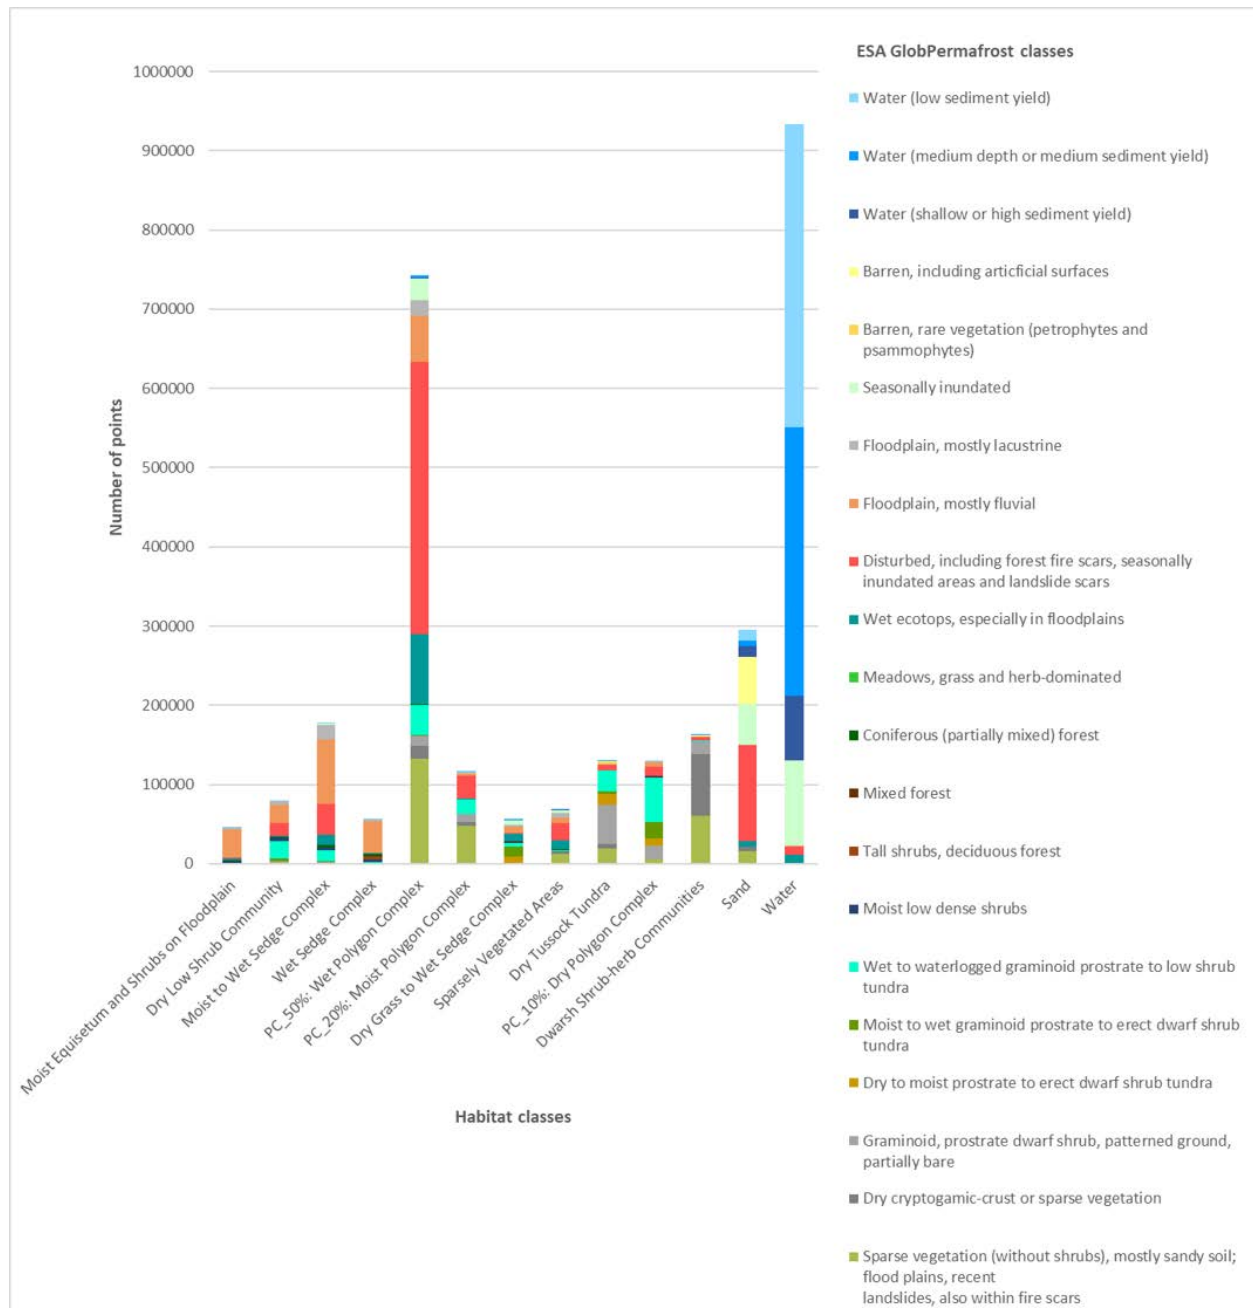

**Figure S5:** Comparison between the habitat classification (Dataset 5) and the land cover classification from ESA GlobPermafrost (Bartsch et al. 2019) based on 3 million sampled points, regularly distributed in the Lena Delta.

## References:

- Bartsch, A., B. Widhalm, G. Pointner, K. Ermokhina, M. Leibman, and B. Heim. 2019. Landcover derived from Sentinel-1 and Sentinel-2 satellite data (2015-2018) for subarctic and arctic environments. PANGAEA.
- Landgraf, N., I. Shevtsova, B. Pflug, and B. Heim. 2022. Sentinel-2 derived central Lena Delta land cover classification. PANGAEA.
- Lisovski, S., A. Runge, R. R. Okoth, I. Shevtsova, and B. Heim. 2022. Lena Delta Land Cover Classification (2018, Sentinel-2). PANGAEA.
- Runge, A., M. Fuchs, I. Shevtsova, N. Landgraf, B. Heim, U. Herzsuh, and G. Grosse. 2022. Hyperspectral field spectrometry of Arctic vegetation units in the central Lena Delta. PANGAEA.
- Schneider, J., G. Grosse, and D. Wagner. 2009. Land cover classification of tundra environments in the Arctic Lena Delta based on Landsat 7 ETM+ data and its application for upscaling of methane emissions. *Remote Sensing of Environment* **113**:380-391.
- Shevtsova, I., B. Heim, A. Runge, M. Fuchs, J. Melchert, and U. Herzsuh. 2021a. Total above-ground biomass of 25 vegetation sites of central Lena Delta from 2018. PANGAEA.
- Shevtsova, I., N. Laschinskiy, B. Heim, and U. Herzsuh. 2021b. Foliage projective cover of 26 vegetation sites of central Lena Delta from 2018. PANGAEA.
